# Supplementary material
Source: PubMed Central journal article supplement (PMC6275631)
Supplement: 11658_2010_41_MOESM1_ESM.pdf [file 11658_2010_41_MOESM1_ESM.pdf]

Supplementary material

**ZFAT IS A CRITICAL MOLECULE FOR CELL SURVIVAL IN MOUSE EMBRYONIC FIBROBLASTS**

KEIKO DOI<sup>1,2</sup>, TAKAHIRO FUJIMOTO<sup>1,2</sup>, MIDORI KOYANAGI<sup>1,2</sup>,  
 TOSHIYUKI TSUNODA<sup>1,2</sup>, YOKO TANAKA<sup>1,2</sup>, YASUHIRO YOSHIDA<sup>1</sup>,  
 YASUO TAKASHIMA<sup>2</sup>, MASAHIDE KUROKI<sup>2</sup>, TAKEHIKO SASAZUKI<sup>3</sup>  
 and SENJI SHIRASAWA<sup>1,2\*</sup>

<sup>1</sup>Department of Cell Biology, Faculty of Medicine, Fukuoka University,  
 7-45-1 Nanakuma, Jonan-ku, Fukuoka 814-0180, Japan, <sup>2</sup>Center for Advanced  
 Molecular Medicine, Fukuoka University, Fukuoka 814-0180, Japan,  
<sup>3</sup>Kyushu University, Fukuoka 812-8581, Japan

Suppl. Tab. 1. Primers used for quantitative RT-PCR.

| MEFs          |          | MOLT-4        |          |
|---------------|----------|---------------|----------|
| Primer set ID |          | Primer set ID |          |
| Adam17        | MA091218 | ADAM17        | HA105199 |
| Akap13        | MA088052 | AKAP13        | HA122103 |
| Bcl2          | MA027977 | BCL2          | HA032558 |
| Bcl6          | MA027982 | BCL6          | HA090378 |
| Cadm1         | MA073635 | CADM1         | HA110475 |
| Cxcl3         | MA049853 | CXCL3         | HA129441 |
| Depdc6        | MA094585 | DEPDC6        | HA052293 |
| Flt1          | MA082484 | FLT1          | HA126180 |
| Gfra1         | MA059974 | GFRA1         | HA139830 |
| Il6st         | MA095176 | IL6ST         | HA121180 |
| Jag1          | MA031629 | JAG1          | HA073121 |
| Mid1          | MA082931 | MID1          | HA118404 |
| Mxd1          | MA087797 | MXD1          | HA104745 |
| Nek1          | MA072572 | NEK1          | HA128746 |
| Nf2           | MA072972 | NF2           | HA113811 |
| Perp          | MA080089 | PERP          | HA139829 |

| MEFs          |          | MOLT-4        |          |
|---------------|----------|---------------|----------|
| Primer set ID |          | Primer set ID |          |
| Pmp22         | MA026714 | PMP22         | HA032054 |
| Prrx1         | MA083711 | PRRX1         | HA111437 |
| Tmeff2        | MA033138 | TMEFF2        | HA047413 |
| Vegfa         | MA069706 | VEGFA         | HA078904 |
| Zfhx3         | MA082442 | ZFHX3         | HA121221 |
| Gapdh         | MA050371 | ACTB          | HA067803 |

Suppl. Tab. 2. The concordant relationship between the expression data obtained from microarray analysis and that from quantitative RT-PCR in MEFs and MOLT-4 cells transfected with ZFAT-siRNA.

| Gene symbol (NetAffx)             | Gene title (NetAffx)                                                                                  | Probe ID     | MEFs_siZFAT                           |                                       | MOLT-4_siZFAT                         |                                       |       |
|-----------------------------------|-------------------------------------------------------------------------------------------------------|--------------|---------------------------------------|---------------------------------------|---------------------------------------|---------------------------------------|-------|
|                                   |                                                                                                       |              | Microarray                            | qRT-PCR                               | Microarray                            | qRT-PCR                               |       |
|                                   |                                                                                                       |              | Fold change mZFAT-siRNA/control-siRNA | Fold change mZFAT-siRNA/control-siRNA | Fold change hZFAT-siRNA/control-siRNA | Fold change hZFAT-siRNA/control-siRNA |       |
| Cell death                        |                                                                                                       |              |                                       |                                       |                                       |                                       |       |
| Bcl2                              | B-cell leukemia/lymphoma 2                                                                            | 1437122_at   | -2.22                                 | -2.34                                 | 203685_at                             | -2.12                                 | -2.53 |
|                                   |                                                                                                       | 1457687_at   | -1.74                                 |                                       |                                       |                                       |       |
|                                   |                                                                                                       | 1422938_at   | -1.44                                 |                                       |                                       |                                       |       |
| Gfra1                             | glial cell line derived neurotrophic factor family receptor alpha 1                                   | 1450440_at   | -3.97                                 | -2.04                                 | 227550_at                             | -1.62                                 | -1.55 |
|                                   |                                                                                                       | 1439015_at   | -1.81                                 |                                       |                                       |                                       |       |
| Nek1                              | NIMA (never in mitosis gene a)-related expressed kinase 1, mRNA (cDNA clone MGC:189932 IMAGE:9088119) | 1438592_at   | -1.94                                 | -1.77                                 | 216213_at                             | -1.65                                 | -1.04 |
|                                   |                                                                                                       | 1434267_at   | -1.78                                 |                                       |                                       |                                       |       |
| Perp                              | PERP, TP53 apoptosis effector                                                                         | 1416271_at   | -3.00                                 | -2.90                                 | 217744_s_at                           | -1.50                                 | -0.93 |
| Cellular growth and proliferation |                                                                                                       |              |                                       |                                       |                                       |                                       |       |
| Adam17                            | a disintegrin and metallo-peptidase domain 17                                                         | 1421857_at   | -1.97                                 | -3.23                                 | 237897_at                             | -1.43                                 | -0.89 |
|                                   |                                                                                                       | 1421858_at   | -1.97                                 |                                       |                                       |                                       |       |
|                                   |                                                                                                       | 1421859_at   | -2.19                                 |                                       |                                       |                                       |       |
| Akap13                            | A kinase (PRKA) anchor protein                                                                        | 131430185_at | -1.30                                 | -1.09                                 | 232188_at                             | -1.39                                 | -1.09 |
| Cadm1                             | cell adhesion molecule 1                                                                              | 1417377_at   | -1.54                                 | -1.25                                 | 209030_s_at                           | -1.39                                 | -1.62 |
|                                   |                                                                                                       | 1417376_a_at | -1.35                                 |                                       |                                       |                                       |       |
| Depdc6                            | DEP domain containing 6                                                                               | 1451348_at   | -2.29                                 | -2.20                                 | 218858_at                             | -2.05                                 | -1.70 |
|                                   |                                                                                                       | 1428622_at   | -2.26                                 |                                       |                                       |                                       |       |
|                                   |                                                                                                       | 1443579_s_at | -1.84                                 |                                       |                                       |                                       |       |
|                                   |                                                                                                       | 1453571_at   | -1.35                                 |                                       |                                       |                                       |       |

| Gene symbol<br>(NetAffx) | Gene title<br>(NetAffx)                                                | MEFs_siZFAT  |                                                       |                                       | MOLT-4_siZFAT |                                                      |                                       |
|--------------------------|------------------------------------------------------------------------|--------------|-------------------------------------------------------|---------------------------------------|---------------|------------------------------------------------------|---------------------------------------|
|                          |                                                                        | Probe ID     | qRT-PCR                                               |                                       | Probe ID      | qRT-PCR                                              |                                       |
|                          |                                                                        |              | Fold change<br>mZFAT -<br>siRNA/<br>control-<br>siRNA | mZFAT-<br>siRNA/<br>control-<br>siRNA |               | Fold change<br>hZFAT-<br>siRNA/<br>control-<br>siRNA | hZFAT-<br>siRNA/<br>control-<br>siRNA |
| Jag1                     | jagged 1                                                               | 1421106_at   | -1.47                                                 | -1.11                                 | 209099_x_at   | -1.53                                                | -0.60                                 |
|                          |                                                                        | 1434070_at   | -1.46                                                 |                                       |               |                                                      |                                       |
| Mxd1                     | MAX dimerization protein 1                                             | 1434830_at   | -2.60                                                 | -1.00                                 | 228846_at     | -1.36                                                | -0.78                                 |
| Mid1                     | midline 1                                                              | 1438239_at   | -1.30                                                 | -0.84                                 | 210694_s_at   | -1.39                                                | -0.98                                 |
| Nf2                      | neurofibromatosis 2                                                    | 1450382_at   | -1.58                                                 | -1.63                                 | 238618_at     | -1.35                                                | -1.00                                 |
|                          |                                                                        | 1421820_a_at | -1.47                                                 |                                       |               |                                                      |                                       |
| Pmp22                    | peripheral myelin protein 22                                           | 1417133_at   | -2.91                                                 | -3.03                                 | 210139_s_at   | -1.32                                                | -1.62                                 |
| Prrx1                    | paired related homeobox 1                                              | 1439774_at   | -1.66                                                 | -1.58                                 | 205991_s_at   | -1.33                                                | N.D.                                  |
|                          |                                                                        | 1425528_at   | -1.41                                                 |                                       |               |                                                      |                                       |
|                          |                                                                        | 1425526_a_at | -1.33                                                 |                                       |               |                                                      |                                       |
|                          |                                                                        | 1425527_at   | -1.26                                                 |                                       |               |                                                      |                                       |
| Tmeff2                   | transmembrane protein with EGF-like and two follistatin-like domains 2 | 1441598_at   | -1.74                                                 | -1.34                                 | 224321_at     | -1.46                                                | -1.22                                 |
| Vegfa                    | vascular endothelial growth factor A                                   | 1420909_at   | -1.27                                                 | -1.26                                 | 210512_s_at   | -1.31                                                | -1.01                                 |
|                          |                                                                        |              |                                                       |                                       | 210513_s_at   | -1.76                                                |                                       |
| Zfhx3                    | zinc finger homeobox 3                                                 | 1453267_at   | -1.52                                                 | -1.32                                 | 226137_at     | -1.47                                                | -0.83                                 |
|                          |                                                                        | 1429725_at   | -1.45                                                 |                                       |               |                                                      |                                       |
|                          |                                                                        | 1449947_s_at | -1.39                                                 |                                       |               |                                                      |                                       |
|                          |                                                                        | 1420650_at   | -1.38                                                 |                                       |               |                                                      |                                       |
|                          |                                                                        | 1420649_at   | -1.38                                                 |                                       |               |                                                      |                                       |
| Immunological disease    |                                                                        |              |                                                       |                                       |               |                                                      |                                       |
| Bcl6                     | B-cell leukemia/lymphoma 6                                             | 1421818_at   | -1.25                                                 | -1.44                                 | 203140_at     | -1.85                                                | -1.28                                 |
| Cxcl3                    | chemokine (C-X-C motif) ligand 3                                       | 1438148_at   | -1.56                                                 | -3.58                                 | 207850_at     | -1.61                                                | -1.14                                 |
| Flt1                     | FMS-like tyrosine kinase 1                                             | 1451756_at   | -1.62                                                 | -1.30                                 | 232809_s_at   | -1.31                                                | -1.37                                 |
|                          |                                                                        | 1454037_a_at | -1.33                                                 |                                       |               |                                                      |                                       |
|                          |                                                                        | 1440926_at   | -1.31                                                 |                                       |               |                                                      |                                       |
| Il6st                    | interleukin 6 signal transducer                                        | 1421239_at   | -1.50                                                 | -1.40                                 | 204864_s_at   | -1.69                                                | -1.70                                 |
|                          |                                                                        | 1460295_s_at | -1.37                                                 |                                       |               |                                                      |                                       |
|                          |                                                                        | 1452843_at   | -1.37                                                 |                                       |               |                                                      |                                       |
